# Supplementary material for: Mutational Landscape of cfDNA Identifies Distinct Molecular Features Associated With Therapeutic Response to First-Line Platinum-Based Doublet Chemotherapy in Patients with Advanced NSCLC
Source: PubMed Central journal article supplement — Theranostics. 2017 Oct 17;7(19):4753–62. doi: 10.7150/thno.21687 (PMC5706097; doi:10.7150/thno.21687), 2017-10-17
Supplement: thnov07p4753s1.pdf [file thnov07p4753s1.pdf]

## Supplementary Material

# Mutational landscape of cell-free DNA identifies distinct molecular features associated with therapeutic response to platinum based first-line chemotherapy in patients with advanced NSCLC

Tao Jiang, Xuefei Li, Jianfei Wang, Chunxia Su, Wenbo Han, Chao Zhao, Fengying Wu, Guanghui Gao, Wei Li, Jie Zhang, Xiaoxia Chen, Jiayu Li, Fei Zhou, Jing Zhao, Weijing Cai, Anwen Xiong, Henghui Zhang, Bo Du, Jun Zhang, Shengxiang Ren, Caicun Zhou, Hui Yu, Fred, R. Hirsch

### Supplemental Figures

#### PAGE 2

**Supplementary Figure S1.** Association between baseline cfDNA concentration and treatment response.

#### PAGE 3

**Supplemental Figure S2.** Relationship between copy number variation (CNV)<sup>†</sup> from genomic DNA and response to treatment. **(A)** CNV profiles from genomic DNA was significantly different between patients with PR vs. SD/PD; **(B)** No segregation according to objective response was observed via hierarchical clustering of genomic DNA. <sup>†</sup> CNV here was calculated through the value of genomic DNA compared with the DNA value of the patient's blood cell pellets.

#### PAGE 4

**Supplemental Figure S3.** Association between baseline *TP53* mutational burden and treatment response.

#### PAGE 5

**Supplemental Figure S4.** The association between molecular mutational burden of 8 genes (BCL2, CD74, GSTP1, MTHFR, MLH1, RRM1, XPC and XRCC1) and treatment response.

#### PAGE 6

**Supplemental Figure S5.** The association between molecular mutational burden of 8 genes (BCL2, CD74, GSTP1, MTHFR, MLH1, RRM1, XPC and XRCC1) and progression free survival.

#### PAGE 7

**Supplemental Table S1.** List of 1086 detected genes in the initial panel (in alphabetical order).

**Supplementary Figure S1.** Association between baseline cfDNA concentration and treatment response.

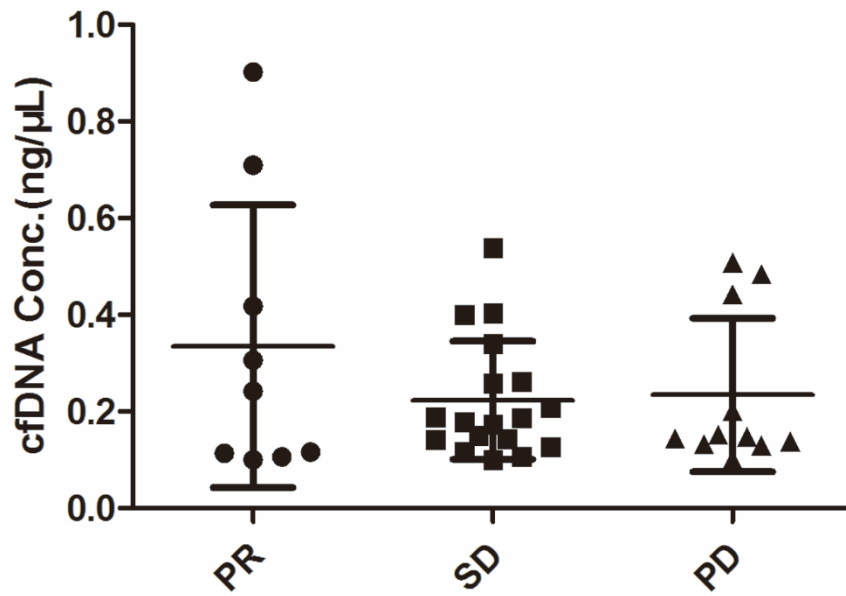

**Supplemental Figure S2.** Relationship between copy number variation (CNV) <sup>#</sup> from genomic DNA and response to treatment. **(A)** CNV profiles from genomic DNA was significantly different between patients with PR vs. SD/PD; **(B)** No segregation according to objective response was observed via hierarchical clustering of genomic DNA. <sup>#</sup> CNV here was calculated through the value of genomic DNA compared with the DNA value of the patient's blood cell pellets.

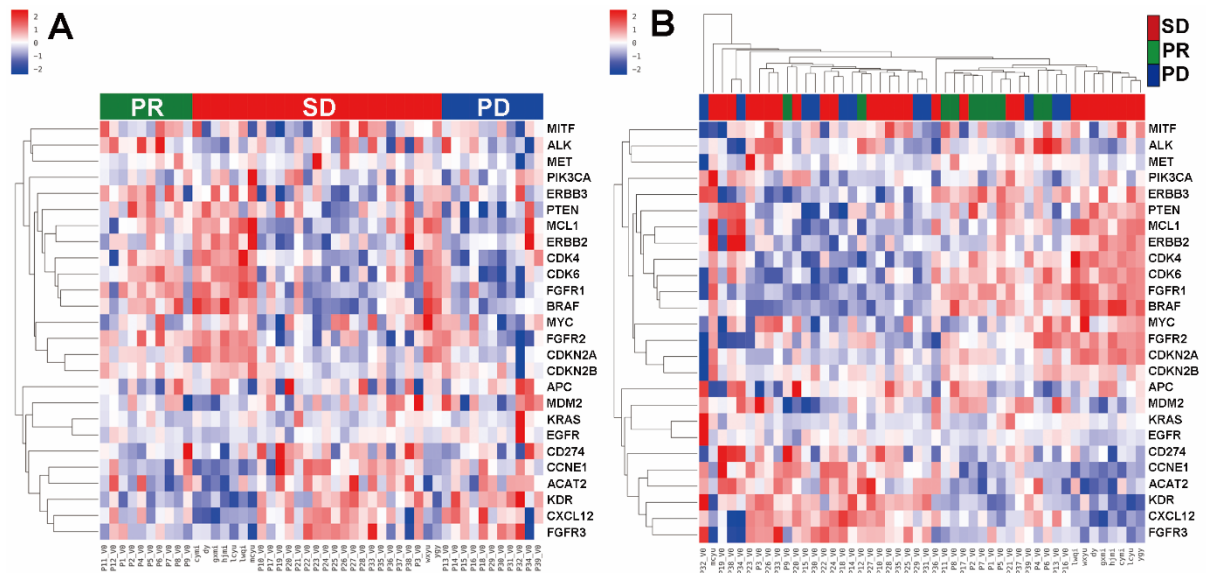

**Supplemental Figure S3.** Association between baseline *TP53* mutational burden and treatment response.

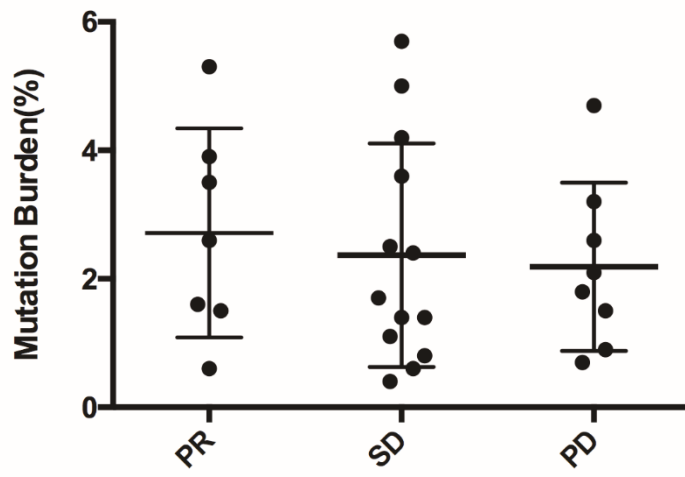

**Supplemental Figure S4.** The association between molecular mutational burden of 8 genes (*BCL2*, *CD74*, *GSTP1*, *MTHFR*, *MLH1*, *RRM1*, *XPC* and *XRCC1*) and treatment response.

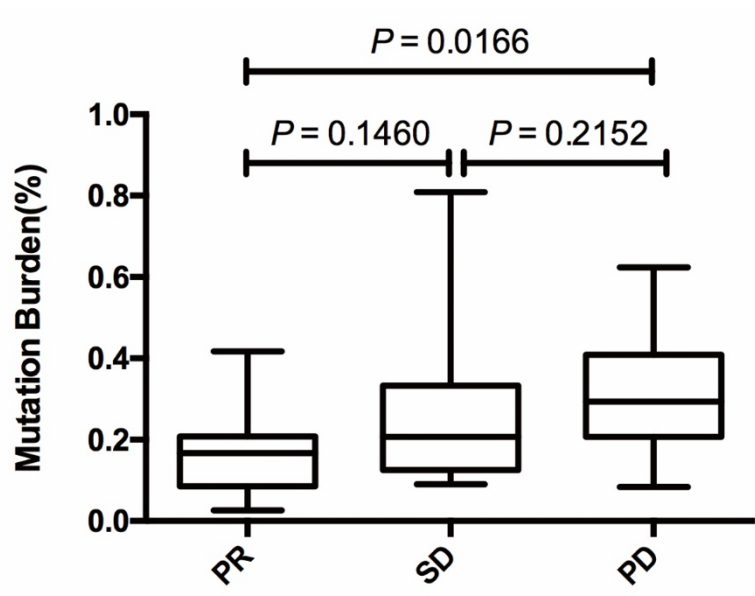

**Supplemental Figure S5.** The association between molecular mutational burden of 8 genes (*BCL2*, *CD74*, *GSTP1*, *MTHFR*, *MLH1*, *RRM1*, *XPC* and *XRCC1*) and progression free survival.

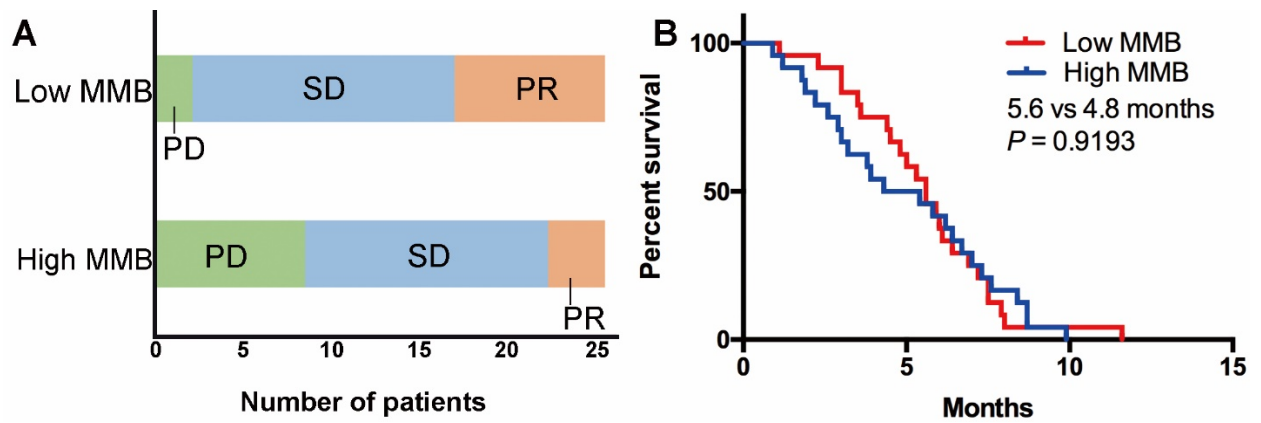

**Supplemental Table S1.** List of 1086 detected genes in the initial panel (in alphabetical order).

A

|            |          |         |         |              |           |        |
|------------|----------|---------|---------|--------------|-----------|--------|
| ABCA1      | ABCA3    | ABCB1   | ABCB11  | ABCB4        | ABCB6     | ABCC1  |
| ABCC11     | ABCC2    | ABCC3   | ABCC4   | ABCC5        | ABCC5-AS1 | ABCC6  |
| ABCC9      | ABCG1    | ABCG2   | ABL1    | ACE          | ACHE      | ACO1   |
| ACP5       | ACPP     | ACSM2A  | ACSS2   | ACTA2        | ACTB      | ACTG1  |
| ACTR8      | ACVR2B   | ACYP2   | ADAM22  | ADAMTSL4-AS1 | ADCY10    | ADCY2  |
| ADD1       | ADGRB3   | ADH1A   | ADH1B   | ADH1C        | ADH7      | ADIPOQ |
| ADIPOQ-AS1 | ADRA2A   | ADRA2B  | ADRA2C  | ADRB1        | ADRB2     | ADRB3  |
| AFMID      | AGO1     | AGO2    | AGT     | AGTR1        | AGTRAP    | AGXT   |
| AHR        | AKAP9    | AKNA    | AKRIC2  | AKRIC3       | AKT1      | AKT2   |
| ALB        | ALDH1A1  | ALDH3A1 | ALDH5A1 | ALK          | ALOX12    | ANK1   |
| ANKK1      | ANTXR2   | ANXA11  | AOC1    | AOX1         | APC       | APCS   |
| APOA1      | APOA1-AS | APOA4   | APOA5   | APOB         | APOBEC2   | APOC3  |
| APOE       | APOH     | AQP2    | AQP9    | AR           | ARAF      | AREG   |
| ARHGEF10   | ARHGEF4  | ARID1A  | ARID5B  | ARNT         | ARRDC3    | ARVCF  |
| ASH1L      | ASS1     | ATG5    | ATIC    | ATM          | ATP7A     | ATP7B  |
| ATR        | ATXN2L   | AURKA   | AXIN2   | AZGP1        | AZU1      |        |

B

|        |          |        |       |            |       |      |
|--------|----------|--------|-------|------------|-------|------|
| B2M    | BAIAP2L1 | BAP1   | BAZ2B | BCAT1      | BCHE  | BCL2 |
| BCL2L1 | BCL2L11  | BCOR   | BCR   | BDNF-AS    | BGLAP | BLMH |
| BMP7   | BMX      | BRAF   | BRCA1 | BRCA2      | BRD2  | BRD4 |
| BRWD1  | BTK      | BTN3A1 | BTRC  | BZRAP1-AS1 |       |      |

C

|          |           |         |         |            |        |            |
|----------|-----------|---------|---------|------------|--------|------------|
| C10orf11 | C20orf194 | C2-AS1  | C5orf22 | C8orf34    | CA1    | CA12       |
| CA13     | CA14      | CA3-AS1 | CA4     | CALM3      | CAMK1  | CAMK2A     |
| CAMK4    | CANT1     | CAPG    | CARD16  | CARS       | CARTPT | CASP1      |
| CASP3    | CASP7     | CASP9   | CAT     | CBL        | CBR1   | CBR3       |
| CBS      | CCAT2     | CCBL1   | CCDC189 | CCDC6      | CCL1   | CCND1      |
| CCND2    | CCND3     | CCNE1   | CCNH    | CCNY       | CD14   | CD180      |
| CD1D     | CD274     | CD28    | CD3EAP  | CD40LG     | CD47   | CD55       |
| CD74     | CDA       | CDCSL   | CDH1    | CDK4       | CDK6   | CDK7       |
| CDK8     | CDKN1A    | CDKN1B  | CDKN2A  | CDKN2A-AS1 | CDKN2B | CDKN2B-AS1 |
| CDKN2C   | CEACAM22P | CEP89   | CES2    | CFTR       | CHAT   | CHEK2      |
| CHRNA3   | CHRNA5    | CHST3   | CLCN6   | CLDN34     | CLIC1  | CLIP1      |
| CLK3     | CLTC      | CMPK1   | CMTR1   | CNOT1      | CNR1   | COL1A1     |
| COL1A2   | COL4A1    | COLEC10 | COMT    | CPA1       | CPA2   | CPA4       |
| CPB2     | CRABP2    | CRAT    | CREBBP  | CRP        | CRYZ   | CSDE1      |
| CSF1R    | CSF2RB    | CSF3R   | CSNK2A1 | CSNK2A3    | CSPG4  | CSTF1      |
| CTLA4    | CTNNB1    | CTSL    | CTSS    | CXCL10     | CXCL12 | CXCL8      |
| CXCR2    | CXXC4     | CYBA    | CYP11B2 | CYP19A1    | CYP1A1 | CYP1A2     |
| CYP1B1   | CYP24A1   | CYP2A6  | CYP2B6  | CYP2C19    | CYP2C8 | CYP2D6     |
| CYP2E1   | CYP2R1    | CYP3A4  | CYP3A5  | CYP4A1     | CYP4B1 | CYP4F2     |

D

|        |        |       |               |       |       |        |
|--------|--------|-------|---------------|-------|-------|--------|
| DAPK1  | DAZL   | DBH   | DCBLD1        | DCK   | DCP1B | DCTD   |
| DCTN1  | DCTN5  | DDR1  | DDR2          | DDX20 | DDX53 | DDX6   |
| DERL3  | DGKI   | DHFR  | DKFZP43410714 | DLG4  | DLG5  | DLGAP1 |
| DNMT3A | DOCK4  | DOT1L | DPEP1         | DPP4  | DPYD  | DPYS   |
| DRD2   | DROSHA | DSCAM | DTYMK         |       |       |        |

E

|        |       |       |        |       |       |          |
|--------|-------|-------|--------|-------|-------|----------|
| E2F7   | ECT2L | EFNB2 | EGF    | EGFR  | EGLN3 | EIF3A    |
| EIF4E2 | ELDR  | EML4  | ENOSF1 | EP300 | EPAS1 | EPHA2    |
| EPHA3  | EPHA4 | EPHA5 | EPHA6  | EPHX1 | EPHX2 | EPM2AIP1 |
| EPRS   | ERAP2 | ERBB2 | ERBB3  | ERBB4 | ERC1  | ERCC1    |
| ERCC2  | ERCC3 | ERCC4 | ERCC5  | ERCC6 | EREG  | ERG      |
| ERP44  | ESR1  | ESR2  | ESRP1  | ETF1  | ETV1  | ETV4     |
| ETV5   | ETV6  | EVI2A | EXO1   | EZH2  | EZR   |          |

F

|        |        |        |       |       |         |        |
|--------|--------|--------|-------|-------|---------|--------|
| F10    | F2     | FAAH   | FABP1 | FAF1  | FAM131B | FAM96B |
| FANCA  | FANCC  | FAP    | FARS2 | FASLG | FAT1    | FBXW7  |
| FCGR2A | FCGR3A | FCHSD1 | FCN1  | FCN2  | FDPS    | FECH   |
| FGD4   | FGF3   | FGF4   | FGFR1 | FGFR2 | FGFR3   | FGFR4  |
| FIBCD1 | FKBP4  | FKBP5  | FLCN  | FLT1  | FLT3    | FLT4   |
| FMO2   | FMO3   | FN1    | FNTA  | FNTB  | FOLH1   | FOLR2  |
| FOLR3  | FOXA1  | FRS2   | FSTL5 | FTO   | FTSJ2   |        |

G

|        |        |       |           |       |           |           |
|--------|--------|-------|-----------|-------|-----------|-----------|
| GABBR1 | GABBR2 | GAK   | GALE      | GALNS | GALNT10   | GALNT14   |
| GAPDH  | GARS   | GATA3 | GATA3-AS1 | GATA4 | GATM      | GCKR      |
| GDNF   | GEMIN4 | GGCT  | GGH       | GIPR  | GLP1R     | GLRB      |
| GLRX   | GLRX2  | GNA11 | GNAI1     | GNAQ  | GNAS      | GNB3      |
| GNL3   | GOLGA5 | GOPC  | GP1BA     | GPC1  | GPX5      | GRIK1-AS2 |
| GRIN2B | GRK5   | GSG2  | GSR       | GSS   | GSTA1     | GSTA2     |
| GSTA3  | GSTA5  | GSTM3 | GSTO1     | GSTP1 | GSTT1-AS1 | GUSB      |

H

|          |          |          |          |          |          |          |
|----------|----------|----------|----------|----------|----------|----------|
| H19      | HACL1    | HADH     | HAS3     | HAT1     | HCN4     | HDAC1    |
| HDAC2    | HDAC8    | HERPUD1  | HEXB     | HFE      | HGF      | HIF1A    |
| HIP1     | HLA-A    | HLA-B    | HLA-C    | HLA-DOA  | HLA-DOB  | HLA-DPA1 |
| HLA-DPB1 | HLA-DQA1 | HLA-DQB1 | HLA-DRA  | HLA-DRB1 | HLA-G    | HMGB1    |
| HMGCR    | HNF4A    | HNMT     | HNRNPUL1 | HOOK1    | HOOK3    | HOTAIR   |
| HOTTIP   | HOXA13   | HPGDS    | HRAS     | HSCB     | HSP90AA1 | HSPA5    |
| HSPA8    | HTR2A    | HTR2C    | HTR3B    | HYKK     |          |          |

I



|            |       |         |        |        |        |          |
|------------|-------|---------|--------|--------|--------|----------|
| IDH1       | IDH2  | IFNG    | IFNL2  | IFNL3  | IFNL4  | IGF1     |
| IGF1R      | IGF2  | IGF2BP2 | IGFBP3 | IL12B  | IL13   | IL17A    |
| IL17F      | IL18  | IL1B    | IL1RL1 | IL20RA | IL21R  | IL23R    |
| IL6        | IL6R  | IL6ST   | IL7R   | IMPDH1 | INPP4B | INS-IGF2 |
| Intergenic | IRS1  | ITGA2B  | ITGA4  | ITGA5  | ITGAV  | ITGAX    |
| ITGB1      | ITGB2 | ITGB5   | ITPA   |        |        |          |

J

|      |      |      |      |       |      |      |
|------|------|------|------|-------|------|------|
| JAG1 | JAK1 | JAK2 | JAK3 | JMJD6 | JAG1 | JAK1 |
|------|------|------|------|-------|------|------|

K

|       |          |       |         |       |        |       |
|-------|----------|-------|---------|-------|--------|-------|
| KARS  | KCNMB3   | KCNQ1 | KCNQ5   | KDM4D | KDR    | KEAP1 |
| KIF5B | KIF9-AS1 | KIT   | KLC1    | KLC3  | KLHL12 | KLLN  |
| KMT5A | KMT5B    | KRAS  | KRT19P2 | KSR2  |        |       |

L

|              |              |              |              |              |              |              |
|--------------|--------------|--------------|--------------|--------------|--------------|--------------|
| LAMP3        | LANCL1       | LARP1B       | LDHA         | LDHB         | LDLR         | LEP          |
| LEPR         | LGALS3BP     | LGR5         | LIG3         | LIG4         | LINC00441    | LINC00673    |
| LINC00704    | LIPF         | LMNA         | LOC100128714 | LOC100507053 | LOC100996325 | LOC101054525 |
| LOC101927066 | LOC101927318 | LOC101927768 | LOC101928100 | LOC101928402 | LOC101929532 | LOC101929709 |
| LOC102724050 | LOC284454    | LOC553103    | LPAR6        | LPL          | LRIG3        | LRP1B        |
| LRP2         | LRP5         | LRP6         | LRRC4C       | LRRC56       | LRTM1        | LSM14A       |
| LTA          | LTA4H        | LY86         | LY96         | LYRM5        |              |              |

M

|         |         |         |         |          |         |         |
|---------|---------|---------|---------|----------|---------|---------|
| MAD1L1  | MALAT1  | MALT1   | MAOB    | MAP2K1   | MAP2K2  | MAP3K1  |
| MAP3K5  | MAP3K7  | MAPK11  | MAPK14  | MC4R     | MCL1    | MDM2    |
| MDM4    | MECP2   | MEG3    | MEPIB   | MET      | METAP1  | METTL1  |
| METTL23 | MFSD11  | MGAM    | MGAT4A  | MGMT     | MICB    | MIEN1   |
| MIR1206 | MIR1307 | MIR146A | MIR2053 | MIR300   | MIR323B | MIR423  |
| MIR4288 | MIR449B | MIR4673 | MIR4713 | MIR4728  | MIR4733 | MIR4761 |
| MIR483  | MIR5187 | MIR577  | MIR604  | MIR618   | MIR641  | MIR675  |
| MIR6759 | MIR6891 | MISP    | MITD1   | MITF     | MKRN1   | MKRN2   |
| MLLT3   | MMAB    | MME     | MMP13   | MMP2     | MMP8    | MPL     |
| MROH2A  | MSH2    | MSH3    | MSH6    | MSN      | MST1R   | MTAP    |
| MTHFD1  | MTHFR   | MTOR    | MTR     | MTRNR2L2 | MTRR    | MUTYH   |
| MVP     | MYC     | MYD88   | MYLIP   | MYO5A    |         |         |

N

|        |        |       |        |        |       |       |
|--------|--------|-------|--------|--------|-------|-------|
| NAGA   | NALCN  | NAMPT | NAT2   | NBR2   | NCAM2 | NCF4  |
| NCOA1  | NCOA4  | NEDD4 | NEU2   | NEURL2 | NF1   | NF2   |
| NFASC  | NFATC2 | NLGN1 | NLGN4X | NMRAL1 | NOD2  | NOS3  |
| NOTCH1 | NOTCH2 | NPC1  | NPM1   | NQO1   | NQO2  | NR112 |

|        |         |       |       |       |      |        |
|--------|---------|-------|-------|-------|------|--------|
| NR1I3  | NR3C1   | NR3C2 | NRAS  | NRG1  | NSD1 | NT5C2  |
| NT5C3A | NT5E    | NTHL1 | NTRK1 | NTRK3 | NUDC | NUDT15 |
| NUDT2  | NUP210L |       |       |       |      |        |

O

|      |       |       |       |       |      |  |
|------|-------|-------|-------|-------|------|--|
| OASL | OPRD1 | OPRM1 | OR4D6 | OSGEP | OTOS |  |
|------|-------|-------|-------|-------|------|--|

P

|         |         |         |          |        |        |        |
|---------|---------|---------|----------|--------|--------|--------|
| PACERR  | PACSIN2 | PAGR1   | PAH      | PAK1   | PALB2  | PAPD7  |
| PARD3B  | PARPBP  | PAX5    | PBRM1    | PC     | PCK1   | PCM1   |
| PDCD1   | PDE10A  | PDE4B   | PDE5A    | PDGFB  | PDGFRA | PDGFRB |
| PDK3    | PDPK1   | PDXK    | PDZRN3   | PFKFB3 | PGAP3  | PGBD3  |
| PGR     | PHF7    | PHF8    | PHKG2    | PIGF   | PIK3CA | PIK3CB |
| PIK3R1  | PIK3R2  | PIKFYVE | PIM1     | PINLYP | PKD1   | PLA2G7 |
| PLAU    | PLCB1   | PLCB3   | PLCG2    | PLG    | PLPPR2 | PLXNC1 |
| PMEL    | PMM2    | PNMT    | PNP      | POFUT2 | POLA2  | POLE   |
| POLK    | PON1    | POR     | POU3F2   | PPARA  | PPARD  | PPARG  |
| PPFIBP1 | PPIF    | PPIP5K2 | PPP1R13L | PRB2   | PRCP   | PRDX4  |
| PREP    | PRKAA2  | PRKAR1A | PRKCH    | PRKCI  | PRKG1  | PROM1  |
| PSMA8   | PTCH1   | PTEN    | PTGER4   | PTGES  | PTGR1  | PTGS2  |
| PTH     | PTH1R   | PTK2    | PTPN1    | PTPN23 | PTPRG  | PTPRK  |
| PTPRM   | PTRH2   | PUS1    | PWWP2A   | PYGL   | PYGM   |        |

R

|        |        |         |        |        |         |       |
|--------|--------|---------|--------|--------|---------|-------|
| RAB3D  | RAC1   | RAC2    | RAD50  | RAD51C | RAD52   | RAF1  |
| RALBP1 | RANBP2 | RAPGEF5 | RARG   | RARS   | RAVER2  | RB1   |
| RBFOX1 | RBP2   | RBP4    | REN    | RET    | REV1    | REV3L |
| RFK    | RGS5   | RICTOR  | RNASE2 | RNF128 | RNF130  | RNF43 |
| RORC   | ROS1   | RRAS2   | RRM1   | RRM2   | RUNDC3B | RXRA  |

S

|          |          |            |         |          |          |          |
|----------|----------|------------|---------|----------|----------|----------|
| SCARB1   | SCN10A   | SCN1A      | SCO2    | SDC4     | SDCBP    | SEC16A   |
| SEC31A   | SELE     | SELL       | SEMA3C  | SERPINA3 | SERPINA6 | SERPINA7 |
| SERPINE1 | SERPING1 | SETD2      | SETD3   | SETD6    | SF3B1    | SFXN4    |
| SH2B3    | SH2D5    | SHTN1      | SIGLEC7 | SIRPA    | SIRT2    | SLC10A2  |
| SLC15A1  | SLC19A1  | SLC1A1     | SLC22A1 | SLC22A12 | SLC22A16 | SLC22A17 |
| SLC22A2  | SLC22A4  | SLC22A5    | SLC22A7 | SLC25A13 | SLC28A1  | SLC28A2  |
| SLC28A3  | SLC29A1  | SLC2A1-AS1 | SLC31A1 | SLC34A2  | SLC37A1  | SLC3A2   |
| SLC45A3  | SLC6A4   | SLC7A5     | SLCO1A2 | SLCO1B1  | SLCO1B3  | SLCO4C1  |
| SMARCA1  | SMARCA4  | SMARCAD1   | SMARCB1 | SMCR8    | SMO      | SMS      |
| SMYD2    | SMYD3    | SNAPC5     | SND1    | SNRNP200 | SOCS1    | SOD2     |
| SOD3     | SOS2     | SOX10      | SPARC   | SPG7     | SPIDR    | SPON1    |
| SPP1     | SQSTM1   | SRC        | SRGAP3  | SRXN1    | SSBP2    | ST14     |

|         |         |         |         |         |       |         |
|---------|---------|---------|---------|---------|-------|---------|
| STAG2   | STIM1   | STK11   | STRADA  | STRN    | STS   | SULT1A1 |
| SULT1C4 | SULT1E1 | SULT2B1 | SUPT4H1 | SUV39H2 | SUZ12 | SVOP    |
| SYK     | SYN1    | SYNE1   |         |         |       |         |

T

|           |          |         |         |        |           |           |
|-----------|----------|---------|---------|--------|-----------|-----------|
| TAB1      | TACC3    | TANC1   | TAS2R16 | TBC1D1 | TBC1D20   | TCL1A     |
| TCN1      | TDP1     | TEK     | TENM1   | TF     | TFG       | TGFB1     |
| TGM2      | TH2LCRR  | THRA    | THRB    | TKT    | TLR2      | TLR3      |
| TLR4      | TLR7     | TLR9    | TMPRSS2 | TNF    | TNFRSF10B | TNFRSF11A |
| TNFRSF11B | TNFRSF1A | TNFSF11 | TNFSF14 | TNIP1  | TNNC1     | TNRC6A    |
| TNRC6B    | TOMM40L  | TOP1    | TOP2A   | TOP2B  | TP53      | TPBG      |
| TPH2      | TPM3     | TPM4    | TPMT    | TPP1   | TRIM24    | TRIM27    |
| TRIM33    | TRMT61B  | TRPV4   | TSC1    | TSC2   | TSG1      | TSHR      |
| TSPAN31   | TTK      | TTR     | TUBB1   | TUBB2A | TXNRD2    | TYMP      |
| TYMS      | TYW3     |         |         |        |           |           |

U

|        |         |        |        |        |        |        |
|--------|---------|--------|--------|--------|--------|--------|
| U2AF1  | UBASH3B | UBC    | UBE2D1 | UBE2I  | UGT1A1 | UGT1A3 |
| UGT1A4 | UGT1A6  | UGT1A7 | UGT1A8 | UGT1A9 | UGT2B7 | ULBP3  |
| ULK3   | ULK4    | UMPS   | UPB1   | UPP1   | USP6   | UTY    |

V

|       |     |     |       |       |     |        |
|-------|-----|-----|-------|-------|-----|--------|
| VAC14 | VCL | VDR | VEGFA | VEGFC | VHL | VKORC1 |
| VWF   |     |     |       |       |     |        |

W

|      |      |      |       |      |  |  |
|------|------|------|-------|------|--|--|
| WAPL | WARS | WDR7 | WNT5B | WVOX |  |  |
|------|------|------|-------|------|--|--|

X

|       |       |     |     |      |       |       |
|-------|-------|-----|-----|------|-------|-------|
| XBP1  | XDH   | XPA | XPC | XPO5 | XRCC1 | XRCC3 |
| XRCC4 | XRCC5 |     |     |      |       |       |

Z

|       |         |        |        |        |        |       |
|-------|---------|--------|--------|--------|--------|-------|
| ZADH2 | ZBTB17  | ZC3H13 | ZCCHC6 | ZNF276 | ZNF423 | ZNRF3 |
| ZPR1  | ZSCAN30 |        |        |        |        |       |
